# Supplementary material
Source: Springer Nature journal article supplement (https://www.springermedizin.de/resource/supplementary/12969_2012_970_MOESM2_ESM.pdf/9589136)

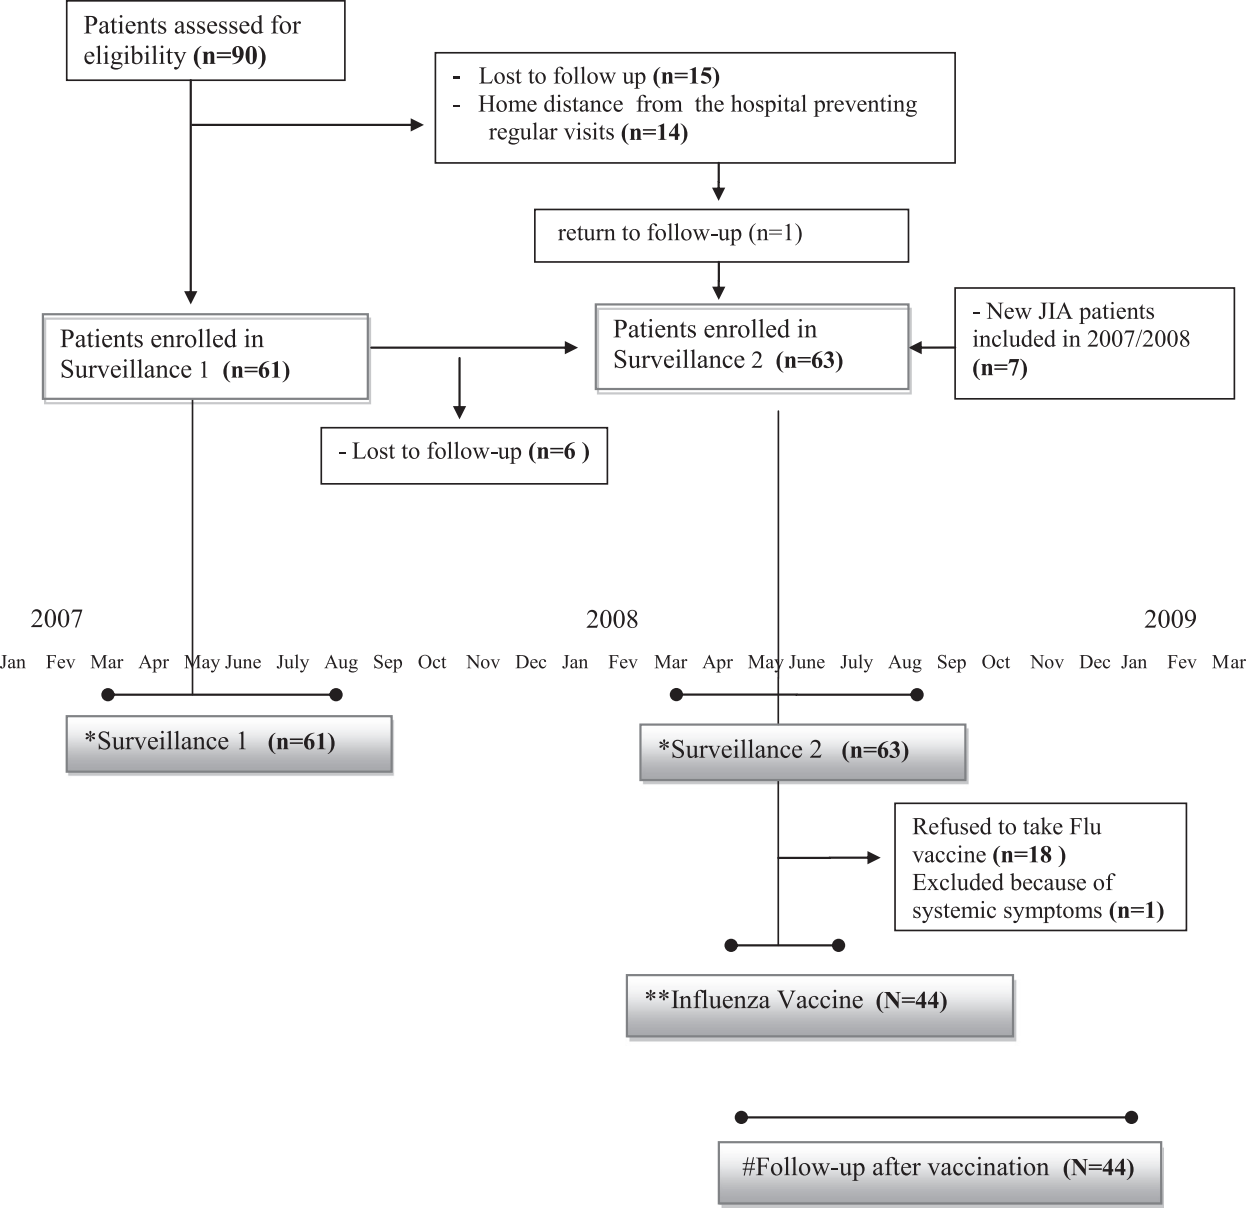

Supplement: MOESM2 [file 9589136]
